# Supplementary material for: Genetic Contributions to Early and Late Onset Ischemic Stroke
Source: bioRxiv or medRxiv preprint supplement (doi:10.1101/2021.11.06.21265795), 2021-11-08

eFigure 2a. Association of *ABO* SNP rs8176685 (blood group A1) with early and late onset ischemic stroke (TRANS analysis)

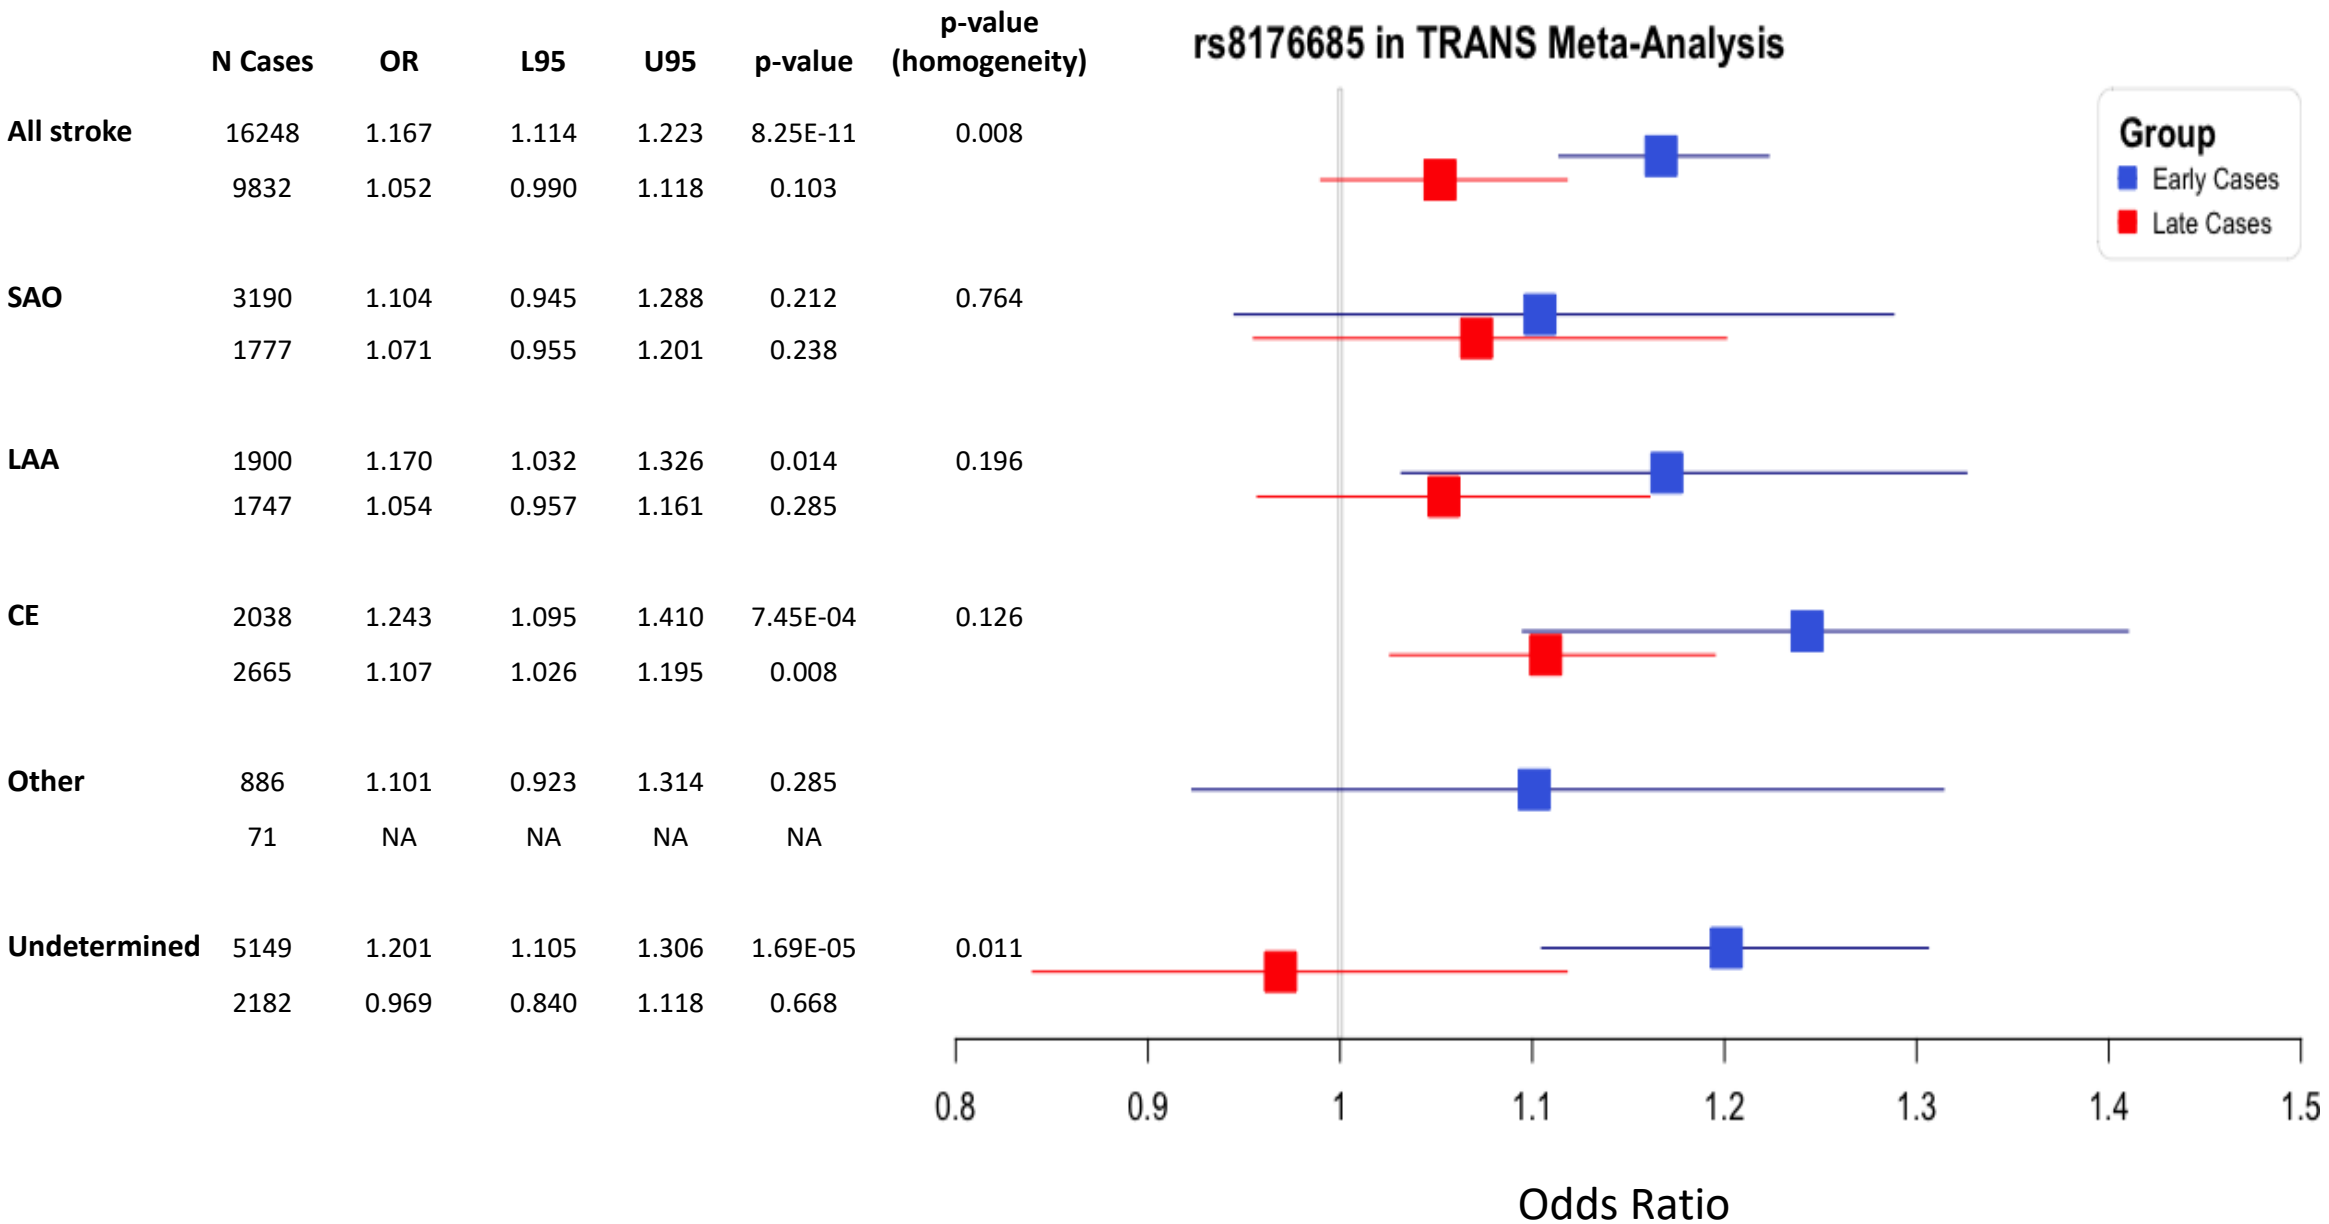

Supplement: Supplementary file [file media-2.pdf]
