# Supplementary material for: Genetic Contributions to Early and Late Onset Ischemic Stroke
Source: bioRxiv or medRxiv preprint supplement (doi:10.1101/2021.11.06.21265795), 2021-11-08

eFigure 2b. Association of *ABO* SNP rs529565 (blood group O1) with early and late onset ischemic stroke (EUR analysis)

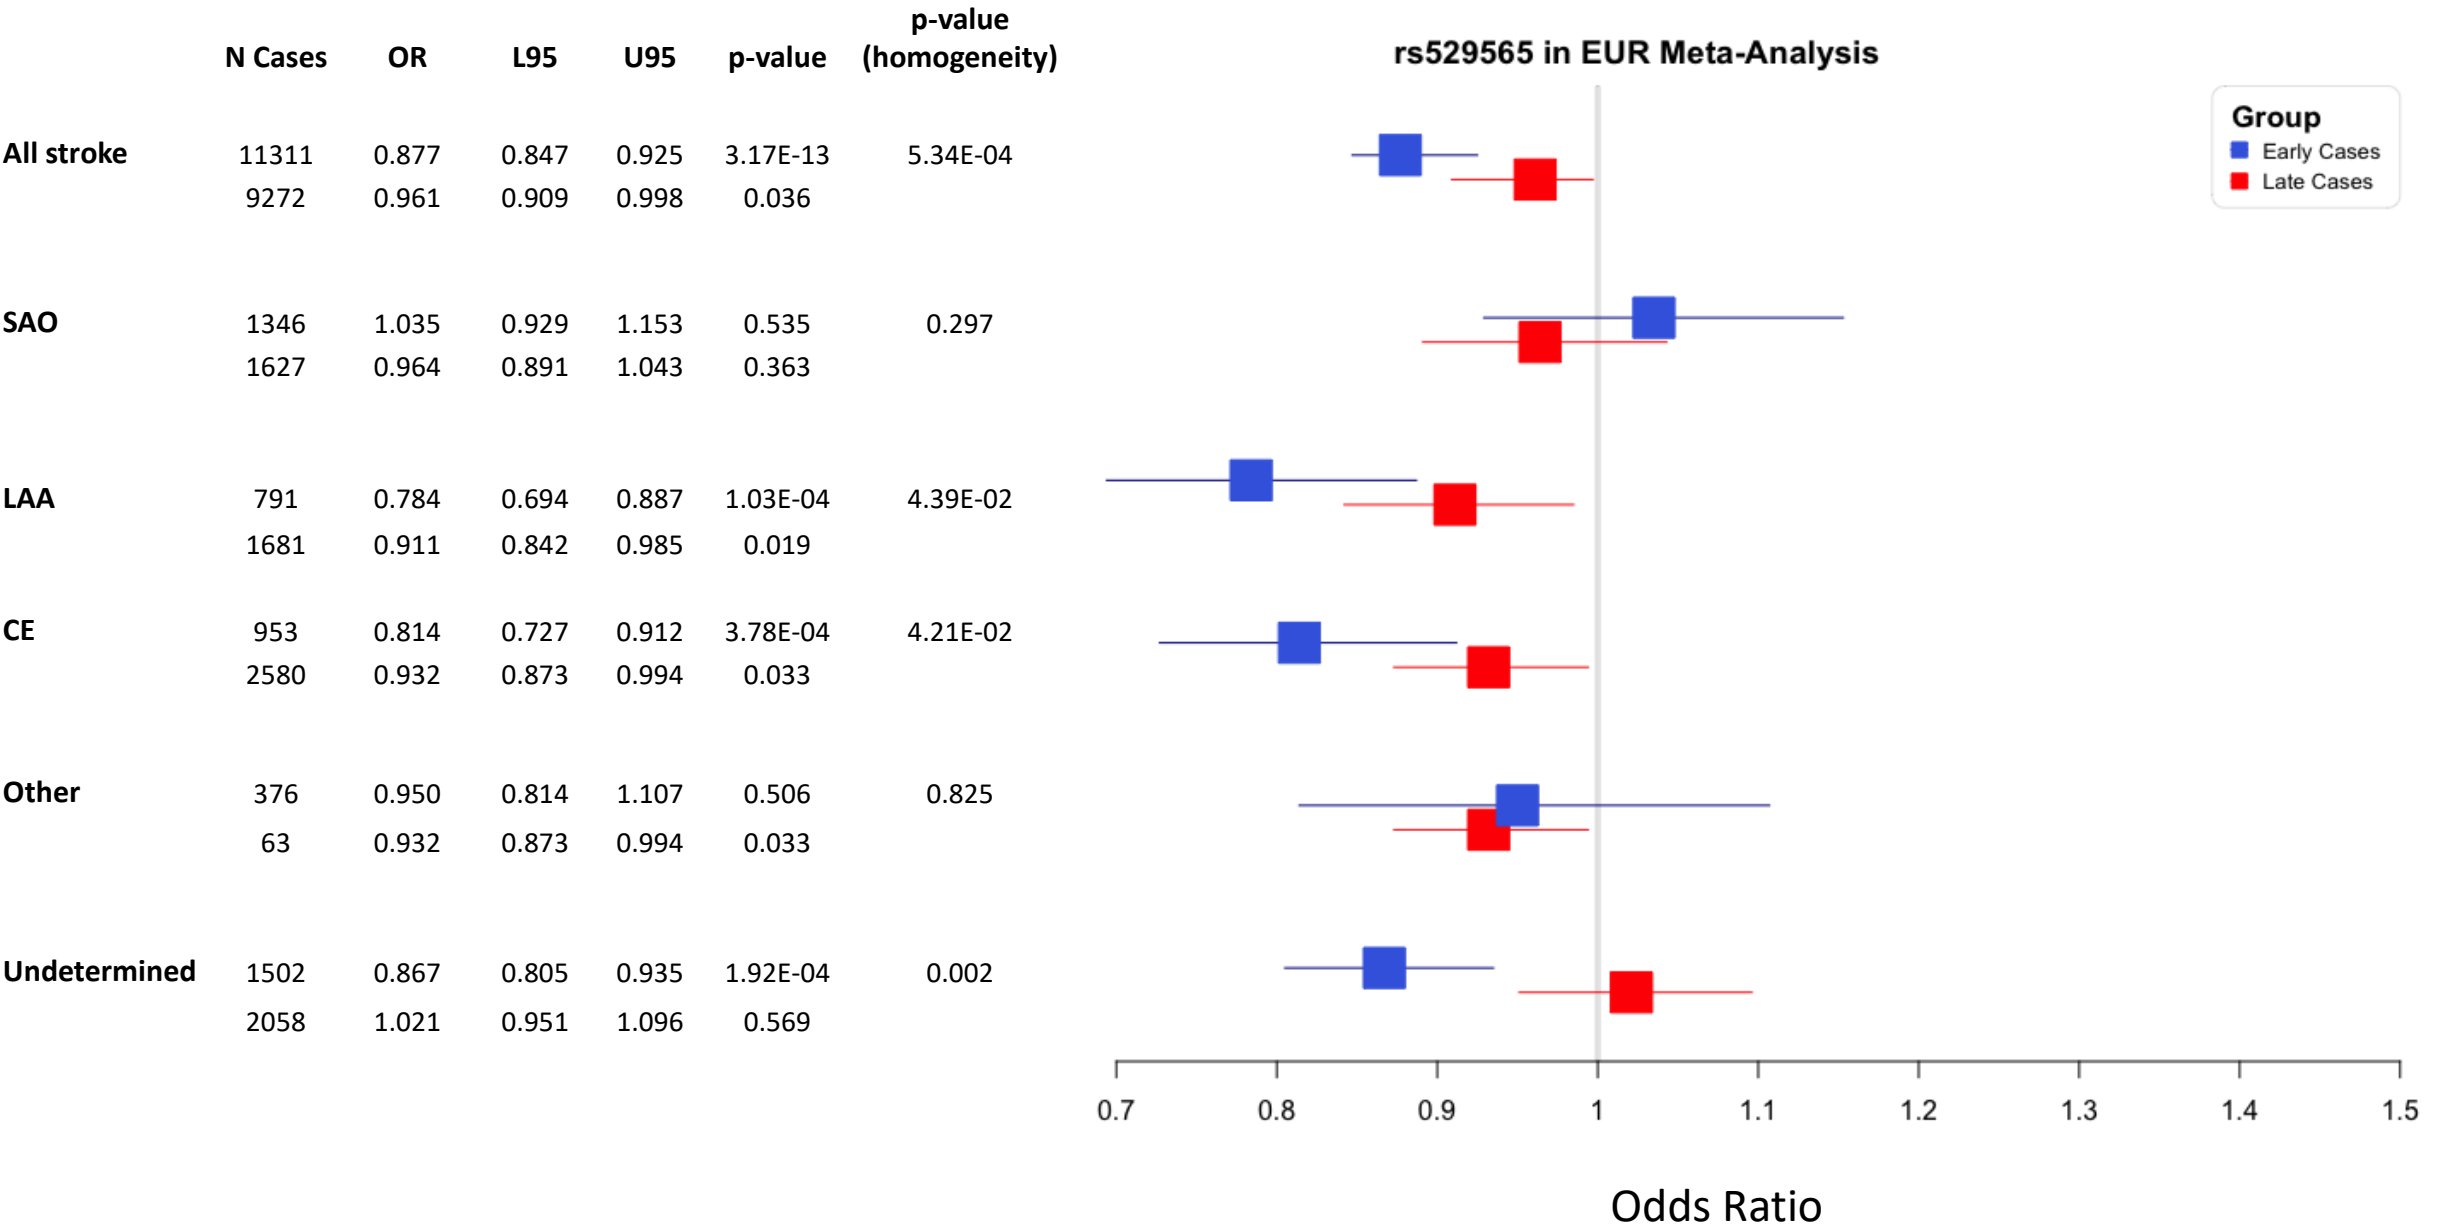

Supplement: Supplementary file [file media-3.pdf]
