# Supplementary material for: Genetic Contributions to Early and Late Onset Ischemic Stroke
Source: bioRxiv or medRxiv preprint supplement (doi:10.1101/2021.11.06.21265795), 2021-11-08
Supplement: Supplementary file [file media-4.pdf]

# eFigure 3. Locuszoom plots of 2 SNPs associated with AIS in EUR

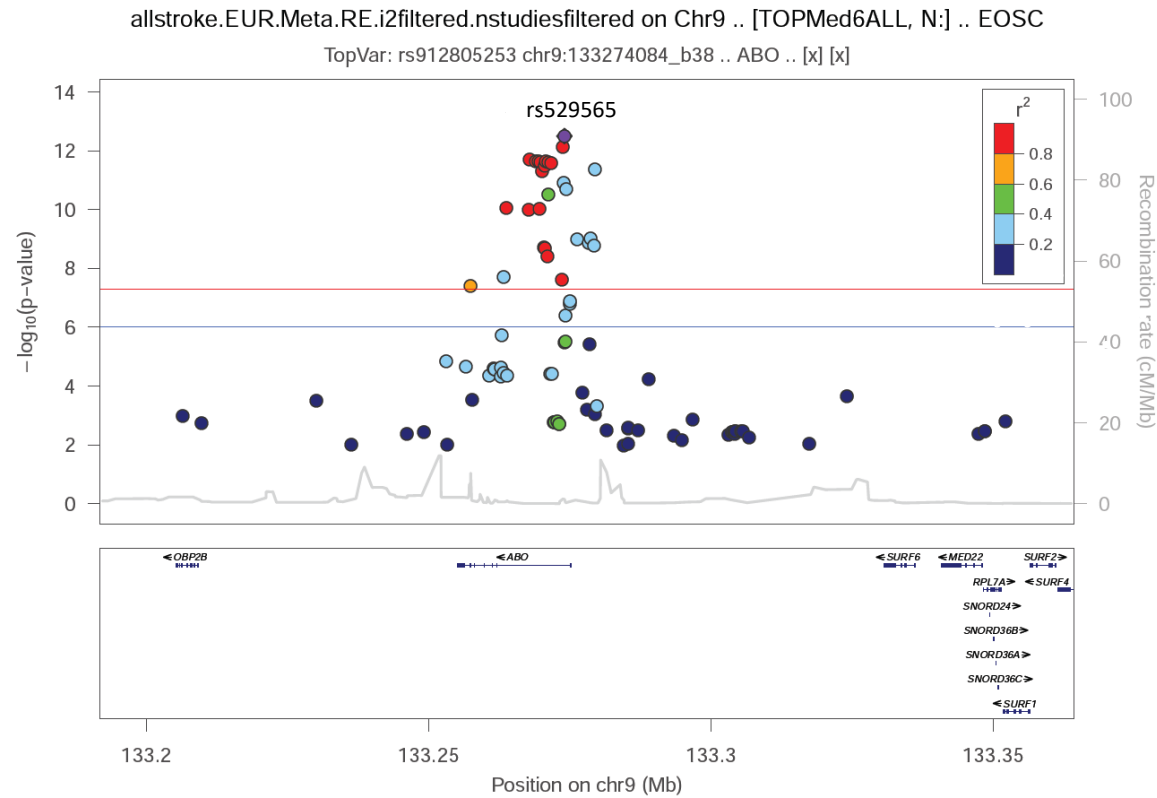

rs529565 is top SNP from EUR metaanalysis

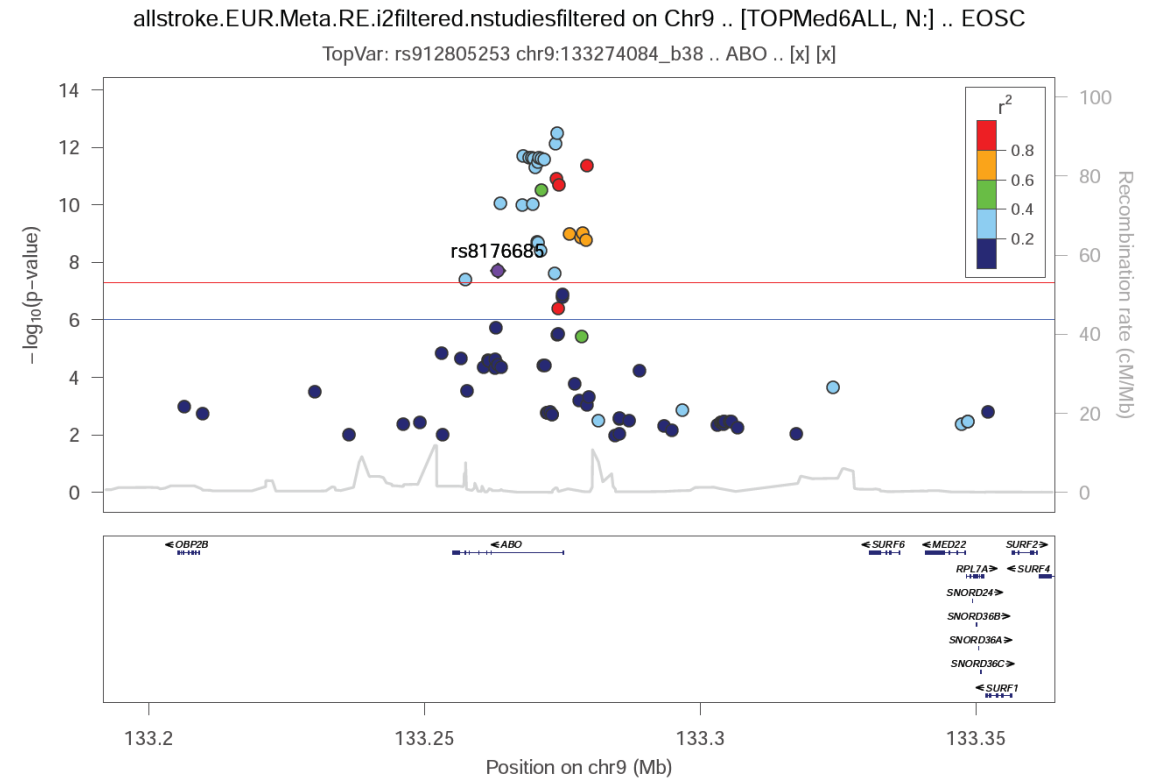

rs8176685 is top SNP from TRANS metaanalysis
